# Supplementary material for: Mononuclear discrete complexes and coordination polymers based on metal(ii) chelidonate complexes with aromatic N,N-chelating ligands
Source: Royal Society of Chemistry journal article supplement (doi:10.1039/c0ce00330a), 2010-10-26
Supplement: c0ce00330a.pdf [file c0ce00330a.pdf]

# **Mononuclear discrete complexes and coordination polymers based on metal(II) chelidonate complexes with aromatic N,N-chelating ligands**

Ana Belén Lago<sup>a</sup>, Rosa Carballo<sup>\*a</sup>, Nuria Fernández-Hermida<sup>a</sup> and Ezequiel M. Vázquez-López<sup>a</sup>

<sup>a</sup> *Departamento de Química Inorgánica, Facultade de Química, Universidade de Vigo, E-36310 Vigo, Galicia, Spain.*  
Fax: +34 986 812556; Tel: +34 986 812273; E-mail: [rcrial@uvigo.es](mailto:rcrial@uvigo.es)

Supplementary material

**Table S1.** Selected bond lengths (Å) and angles (°) for the coordination polymers **1** and **2**.

| <b>1</b>                             |            | <b>2</b>                 |          |
|--------------------------------------|------------|--------------------------|----------|
| Cu–O4                                | 1.908(3)   | Zn1–O6                   | 1.987(5) |
| Cu–O6 <sup>i</sup>                   | 1.940(3)   | Zn1–O14                  | 2.011(5) |
| Cu–O6 <sup>ii</sup>                  | 2.564(3)   | Zn1–O1w                  | 2.089(5) |
| Cu–N1                                | 1.983(3)   | Zn1–N3                   | 2.100(6) |
| Cu–N2                                | 1.992(3)   | Zn1–N4                   | 2.122(7) |
|                                      |            | Zn2–O16                  | 2.007(5) |
|                                      |            | Zn2–O4 <sup>i</sup>      | 2.023(5) |
|                                      |            | Zn2–N2                   | 2.093(6) |
|                                      |            | Zn2–O2w                  | 2.093(5) |
|                                      |            | Zn2–N1                   | 2.118(6) |
| O4–Cu–O6 <sup>i</sup>                | 97.46(12)  | O6–Zn1–O14               | 97.3(2)  |
| O4–Cu–N1                             | 91.91(13)  | O6–Zn1–O1w               | 99.7(2)  |
| O6 <sup>i</sup> –Cu–N1               | 169.60(12) | O14–Zn1–O1w              | 86.4(2)  |
| O4–Cu–N2                             | 166.75(14) | O6–Zn1–N3                | 126.8(2) |
| O6 <sup>i</sup> –Cu–N2               | 90.44(13)  | O14–Zn1–N3               | 135.0(2) |
| N1–Cu–N2                             | 81.23(14)  | O1w–Zn1–N3               | 94.0(2)  |
| O4–Cu–O6 <sup>ii</sup>               | 96.02(12)  | O6–Zn1–N4                | 95.5(3)  |
| O6 <sup>i</sup> –Cu–O6 <sup>ii</sup> | 85.56(11)  | O14–Zn1–N4               | 92.4(3)  |
| N1–Cu–O6 <sup>ii</sup>               | 88.99(12)  | O1w–Zn1–N4               | 164.8(2) |
| N2–Cu–O6 <sup>ii</sup>               | 95.19(12)  | N3–Zn1–N4                | 76.2(2)  |
|                                      |            | O16–Zn2–O4 <sup>i</sup>  | 100.7(3) |
| i = x, 3/2-y, z-1/2                  |            | O16–Zn2–N2               | 132.0(2) |
| ii = 1-x, 1/2+y, 1.5-z               |            | O4 <sup>i</sup> –Zn2–N2  | 126.4(2) |
|                                      |            | O16–Zn2–O2w              | 87.5(2)  |
|                                      |            | O4 <sup>i</sup> –Zn2–O2w | 97.9(2)  |
|                                      |            | N2–Zn2–O2w               | 94.2(2)  |
|                                      |            | O16–Zn2–N1               | 92.8(2)  |
|                                      |            | O4 <sup>i</sup> –Zn2–N1  | 93.5(2)  |
|                                      |            | N2–Zn2–N1                | 77.0(3)  |
|                                      |            | O2w–Zn2–N1               | 168.4(2) |
|                                      |            | i = x-1, y, z-1          |          |

**Table S2.** Selected interatomic bond lengths (Å) and angles (°) for the mononuclear complexes **3–6**

| <b>Compound</b> | <b>3</b>   | <b>4</b>   | <b>5</b> | <b>6</b>   |
|-----------------|------------|------------|----------|------------|
| M–O1w           | 2.004(3)   | 2.033(2)   | 2.090(5) | 2.095(4)   |
| M–O2w           | 1.992(3)   | 2.077(2)   | 2.096(6) | 2.094(4)   |
| M–O11           | 2.032(2)   | 2.045(2)   | 2.028(5) |            |
| M–N1            | 2.177(3)   | 2.194(3)   | 2.059(6) | 2.152(4)   |
| M–N2            | 2.092(3)   | 2.154(2)   | 2.096(6) | 2.189(4)   |
| M–O3w           |            | 2.229(2)   | 2.055(6) |            |
| M–N11           |            |            |          | 2.201(4)   |
| M–N12           |            |            |          | 2.130(4)   |
| O2w–M–O1w       | 117.60(13) | 88.28(10)  | 90.5(2)  | 93.64(15)  |
| O11–M–O2w       | 93.73(11)  | 87.49(9)   | 85.1(2)  |            |
| O1w–M–O11       | 96.96(11)  | 97.31(10)  | 94.8(2)  |            |
| O2w–M–N2        | 121.22(13) | 95.64(10)  | 93.3(2)  | 168.74(15) |
| O1w–M–N2        | 120.34(12) | 94.48(10)  | 94.5(2)  | 92.12(14)  |
| O11–M–N2        | 88.59(10)  | 167.89(9)  | 170.5(2) |            |
| O2w–M–N1        | 90.39(12)  | 91.35(10)  | 94.6(2)  | 92.64(15)  |
| O1w–M–N1        | 92.79(11)  | 171.12(10) | 172.8(2) | 96.09(14)  |
| N1–M–O11        | 166.17(10) | 91.53(9)   | 90.7(2)  |            |
| N2–M–N1         | 78.00(10)  | 76.73(10)  | 80.1(2)  | 77.12(15)  |
| O1w–M–O3w       |            | 91.34(11)  | 88.4(2)  |            |
| O11–M–O3w       |            | 88.56(9)   | 90.9(2)  |            |
| O2w–M–O3w       |            | 175.95(9)  | 175.8(2) |            |
| N2–M–O3w        |            | 88.41(9)   | 90.8(2)  |            |
| N1–M–O3w        |            | 89.64(11)  | 86.9(2)  |            |
| O2w–M–N12       |            |            |          | 94.21(16)  |
| O1w–M–N12       |            |            |          | 91.62(15)  |
| N12–M–N1        |            |            |          | 169.33(16) |
| N12–M–N2        |            |            |          | 95.29(16)  |
| O2w–M–N11       |            |            |          | 88.48(15)  |
| O1w–M–N11       |            |            |          | 168.40(15) |
| N12–M–N11       |            |            |          | 76.84(17)  |
| N1–M–N11        |            |            |          | 95.20(16)  |
| N2–M–N11        |            |            |          | 87.81(16)  |

**Table S3.** Main hydrogen bond distances (Å) and angles (°) for compounds **1–5**

| Compound             | D–H...A                       | d(D–H)  | d(H...A) | d(D...A)  | ∠(DHA) |
|----------------------|-------------------------------|---------|----------|-----------|--------|
| <b>1<sup>a</sup></b> | C14–H14...O3 <sup>i</sup>     | 0.93    | 2.30     | 3.211(6)  | 167    |
|                      | C15–H15...O5 <sup>ii</sup>    | 0.93    | 2.56     | 3.473(5)  | 166    |
|                      | C19–H19...O3 <sup>iii</sup>   | 0.93    | 2.46     | 3.287(6)  | 148    |
| <b>2<sup>b</sup></b> | O1w...O3 <sup>iii</sup>       |         |          | 2.723(8)  |        |
|                      | O1w...O5 <sup>iv</sup>        |         |          | 2.731(9)  |        |
|                      | O2w...O13 <sup>v</sup>        |         |          | 2.760(8)  |        |
|                      | O2w...O3w <sup>i</sup>        |         |          | 2.962(13) |        |
|                      | O4w...O4 <sup>iii</sup>       |         |          | 2.920(2)  |        |
|                      | O4w...O16 <sup>ii</sup>       |         |          | 2.995(2)  |        |
|                      | C24–H24...O15 <sup>i</sup>    | 0.93    | 2.43     | 3.335(13) | 165    |
|                      | C27–H27...O15 <sup>i</sup>    | 0.93    | 2.49     | 3.421(13) | 176    |
|                      | C29–H29...O7 <sup>vii</sup>   | 0.93    | 2.49     | 3.263(14) | 141    |
|                      | C39–H39...O5 <sup>vi</sup>    | 0.93    | 2.48     | 3.282(13) | 144    |
|                      | C38–H38...O13 <sup>viii</sup> | 0.93    | 2.56     | 3.390(12) | 149    |
|                      | C37–H37...O17 <sup>vii</sup>  | 0.93    | 2.53     | 3.453(13) | 171    |
|                      | C34–H34...O17 <sup>vii</sup>  | 0.93    | 2.49     | 3.411(14) | 169    |
| <b>4<sup>c</sup></b> | O4w...O13 <sup>i</sup>        |         |          | 2.903(5)  |        |
|                      | O4w...O3 <sup>ii</sup>        |         |          | 2.945(6)  |        |
|                      | O2w–H2wA...O12 <sup>iii</sup> | 0.75(8) | 2.09(8)  | 2.831(3)  | 172    |
|                      | O2w–H2wB...O14 <sup>iii</sup> | 0.73(8) | 1.98(8)  | 2.706(3)  | 174    |
|                      | O1w–H1wA...O3 <sup>iv</sup>   | 0.72(8) | 2.00(8)  | 2.724(3)  | 175    |
|                      | O1w–H1wB...O13 <sup>v</sup>   | 1.02(8) | 1.65(8)  | 2.659(3)  | 168    |
|                      | C4–H4...O13 <sup>vi</sup>     | 0.93    | 2.39     | 3.267(4)  | 156    |
| <b>5<sup>d</sup></b> | O3w...O6w                     |         |          | 2.617(8)  |        |
|                      | O3w...O5w                     |         |          | 2.828(8)  |        |
|                      | O5w...O3 <sup>i</sup>         |         |          | 2.832(9)  |        |
|                      | O5w...O3 <sup>ii</sup>        |         |          | 2.872(9)  |        |
|                      | O6w...O12 <sup>iii</sup>      |         |          | 2.755(8)  |        |
|                      | O6w...O52 <sup>iii</sup>      |         |          | 2.763(8)  |        |
|                      | O6w...O1 <sup>iii</sup>       |         |          | 2.967(7)  |        |
|                      | O2w...O51 <sup>v</sup>        |         |          | 2.711(8)  |        |
|                      | O2w...O52 <sup>vi</sup>       |         |          | 2.842(7)  |        |
|                      | C17–H17...O3 <sup>iv</sup>    | 0.93    | 2.45     | 3.333(10) | 154    |

<sup>a</sup> i = -1+x, 5/2-y, -1/2+z; ii = -x, 2-y, 1-z; iii = -1+x, y, -1+z.

<sup>b</sup> i = 1-x, 1-y, -z; ii = 1-x, -y, -z; iii = 2-x, -y, 1-z; iv = x-1, y, z; v = 2-x, -y, -z; vi = 2-x, 1-y, 1-z; vii = 2-x, 1-y, -z; viii = x, 1+y, z.

<sup>c</sup> i = 2-x, 1-y, 1-z; ii = -1+x, 1+y, -1+z; iii = -1+x, y, z; iv = 1-x, 1-y, 2-z; v = -1+x, 1+y, z; vi = 3-x, -y, 2-z.

<sup>d</sup> i = x, -y+1/2, z+1/2; ii = x, y, z+1; iii = -x+1, -y, -z+1; iv = x-1, 1/2-y, 1/2+z; v = x-1, y, z; vi = 1-z, -y, -z.

**Table S4.** Main hydrogen bond distances (Å) and angles (°) for compound **6**

| D–H...A                                                   | d(D–H) | d(H...A) | d(D...A) | ∠(DHA) |
|-----------------------------------------------------------|--------|----------|----------|--------|
| Tetrameric association of crystallization water molecules |        |          |          |        |
| O4w...O6w                                                 |        |          | 2.74(2)  |        |
| O3w...O5w <sup>iii</sup>                                  |        |          | 2.69(1)  |        |
| O3w...O4w <sup>iv</sup>                                   |        |          | 2.76(1)  |        |
| O3w...O6w <sup>iv</sup>                                   |        |          | 2.86(2)  |        |
| Linkage of the cationic complex with the water tetramer   |        |          |          |        |
| O2w...O4w <sup>i</sup>                                    |        |          | 2.651(6) |        |
| C1–H1...O6w <sup>i</sup>                                  | 0.93   | 2.62     | 3.28(2)  | 128    |
| Linkage of chelidonate ion with the water tetramer        |        |          |          |        |
| O3w...O33                                                 |        |          | 2.990(9) |        |
| O4w...O36                                                 |        |          | 2.693(7) |        |
| O6w...O35                                                 |        |          | 2.97(2)  |        |
| O5w...O34 <sup>v</sup>                                    |        |          | 2.738(8) |        |
| O6w...O35 <sup>iv</sup>                                   |        |          | 2.92(2)  |        |
| C34–34...O6w <sup>iv</sup>                                | 0.93   | 2.34     | 3.22(2)  | 156    |
| Linkage of the cationic complex with chelidonate ion      |        |          |          |        |
| O1w...O36 <sup>i</sup>                                    |        |          | 2.699(5) |        |
| O1w...O32 <sup>i</sup>                                    |        |          | 2.720(5) |        |
| O1w...O31 <sup>i</sup>                                    |        |          | 2.901(5) |        |
| O2w...O32 <sup>ii</sup>                                   |        |          | 2.643(5) |        |
| C2–H2...O35 <sup>vi</sup>                                 | 0.93   | 2.42     | 3.349(7) | 174    |
| C8–H8...O35 <sup>vii</sup>                                | 0.93   | 2.61     | 3.401(7) | 143    |

<sup>a</sup> i = x+1/2, -y+3/2, z+1/2; ii = 1-x, 2-y, 1-z; iii = 1+x, y, z; iv = 1-x, 1-y, -z; v = -x+1/2, y-1/2, -z+1/2; vi = 3/2-x, 1/2+y, 1/2-z; vii = 1+x, y, 1+z.
